# Supplementary material for: A highly selective and sensitive fluorescence probe for rapid detection of hypochlorite in tap water and cancer cells
Source: Royal Society of Chemistry journal article supplement (doi:10.1039/c6ra23548d), 2016-01-01
Supplement: c6ra23548d1.pdf [file c6ra23548d1.pdf]

## Electronic Supplementary Information

### A highly selective and sensitive fluorescence probe for rapid detection of hypochlorite in tap water and cancer cells

Lanfang Pang,<sup>a</sup> Yanmei Zhou,<sup>a,b,\*</sup> Wenli Gao,<sup>a</sup> Haohan Song,<sup>a</sup> Xiao Wang,<sup>a</sup>

Yong Wang<sup>a</sup>

<sup>a</sup> *Institute of Environmental and Analytical Sciences, College of Chemistry and  
Chemical Engineering, Henan University, Kaifeng, Henan 475004, P.R. China*

<sup>b</sup> *State Key Laboratory of Fine Chemicals, Dalian University of Technology, Dalian  
116024, China*

#### Table of contents:

**Figure S1:** The fluorescence selective study of the probe to other relevant analytes.

**Figure S2:** The solvent dependence.

**Figure S3:** ESI-MS of the probe-ClO<sup>-</sup>.

**Figure S4:** The fluorescence detection of ClO<sup>-</sup> in tap water.

**Figure S5:** The fluorescence intensity of the free probe and probe-ClO<sup>-</sup> at different water volume fraction.

**Figure S6:** The fluorescence intensity of the free probe and probe-ClO<sup>-</sup> at different pH.

**Table S1:** Comparison with other reported hypochlorite probes.

---

\* Correspond author: Tel: +86-371-22868833-3422; Fax: +86-371-23881589  
E-mail address: zhouyanmei@henu.edu.cn (Y.M. Zhou)

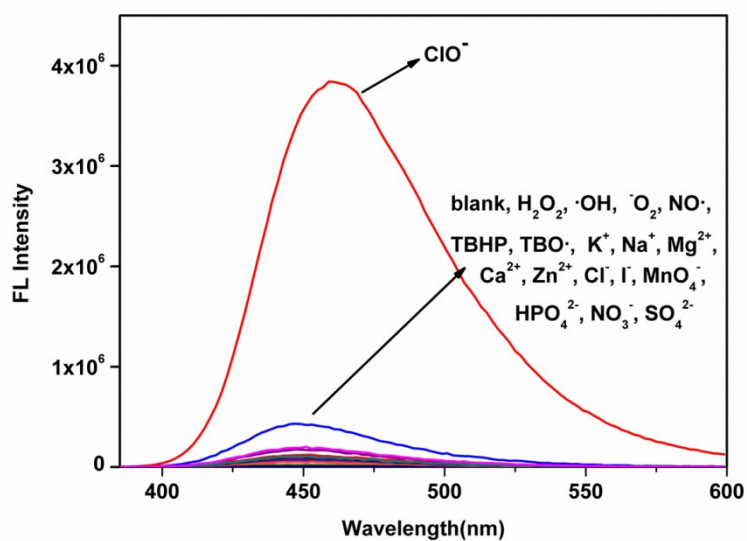

**Fig. S1.** Fluorescence spectra of the probe (10  $\mu\text{M}$ ,  $\lambda_{\text{ex}}=370$  nm) in the presence of  $\text{ClO}^-$  and other relevant analytes in  $\text{C}_2\text{H}_5\text{OH}:\text{H}_2\text{O}$  (v/v=1/1) solution.

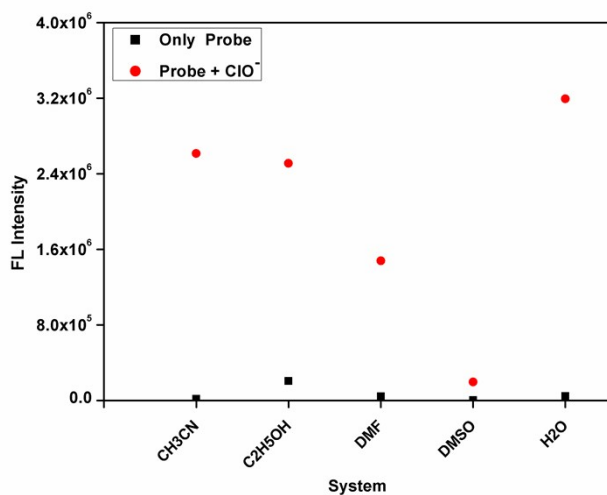

**Fig. S2.** The fluorescence intensity of the free probe and the probe- $\text{ClO}^-$  at different system solutions. ( $\lambda_{\text{ex}}=370$  nm, slit width: 2 nm/2 nm);

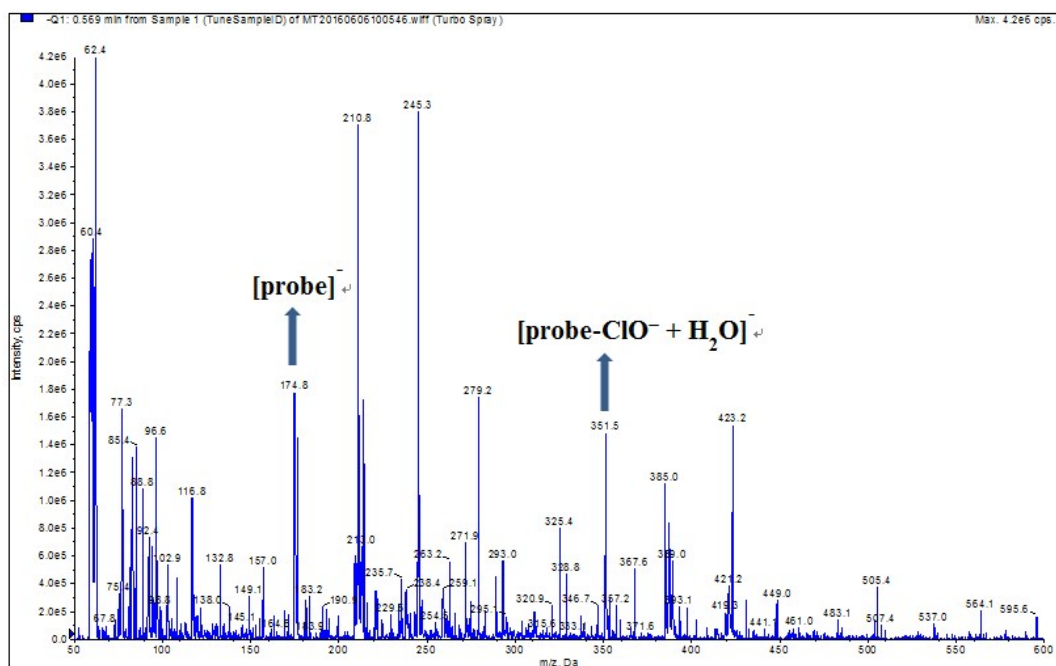

**Fig. S3.** The ESI-MS of the reaction mixture of the probe with  $\text{ClO}^-$ .  $m/z$ : 174.8,  $[\text{probe}]^-$ ;  $m/z$ : 351.5,  $[\text{probe-ClO}^- + \text{H}_2\text{O}]^-$ .

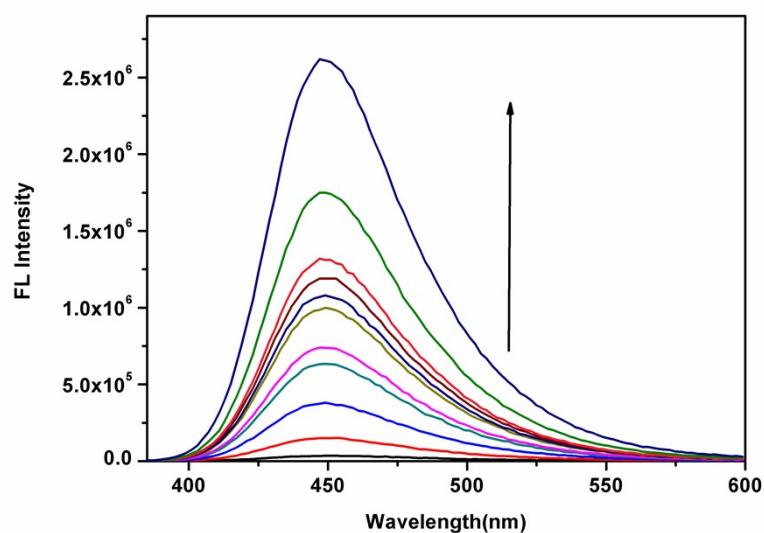

**Fig. S4.** Fluorescence spectra of the probe (10  $\mu\text{M}$ ) in the presence of different quantity of tap water (0-900  $\mu\text{L}$ ) in  $\text{C}_2\text{H}_5\text{OH}:\text{H}_2\text{O}$  (v/v=1/1) solution. ( $\lambda_{\text{ex}}$ =370 nm, slit width: 2 nm/2 nm);

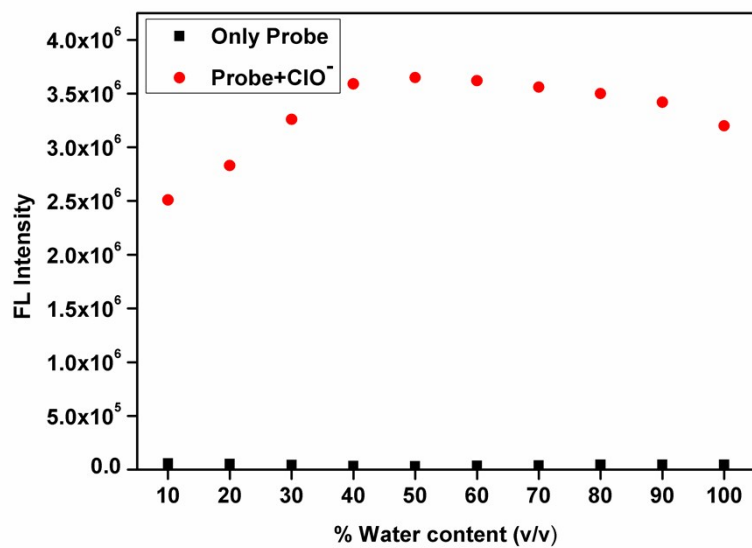

**Fig. S5.** The fluorescence intensity of the free probe and probe-ClO<sup>-</sup> at different water volume fraction. ( $\lambda_{\text{ex}}=370$  nm, slit width: 2 nm/2 nm);

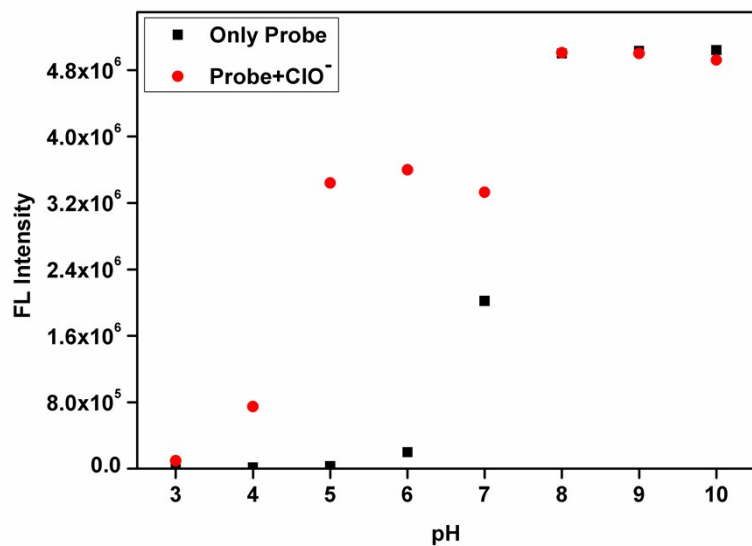

**Fig. S6.** The fluorescence intensity of the free probe and probe-ClO<sup>-</sup> at different pH. ( $\lambda_{\text{ex}}=370$  nm, slit width: 2 nm/2 nm);

**Table S1.** Comparisons of fluorescent probes for ClO<sup>-</sup>

| Ref.      | Linear range   | Detection limit | Respond time | Application                      |
|-----------|----------------|-----------------|--------------|----------------------------------|
| 5         | 0-9 $\mu$ M    | 0.70 $\mu$ M    | 3min         | A549 cells                       |
| 16        | 0.69-6 $\mu$ M | 0.21 $\mu$ M    | 5min         | Tap water                        |
| 18        | 0-22 $\mu$ M   | 0.43 $\mu$ M    | 30s          | RAW 264.7 cells                  |
| 23        | ---            | 0.35 $\mu$ M    | 70min        | Water samples<br>RAW 264.7 cells |
| 25        | 0-4 $\mu$ M    | 0.20 $\mu$ M    | 1min         | RAW 264.7 cells                  |
| 28        | 1-10 $\mu$ M   | 41.3nM          | 180s         | RAW 264.7 cells                  |
| 31        | 0-20 $\mu$ M   | 0.35 $\mu$ M    | 5min         | HepG2 cells                      |
| 40        | 0-70 $\mu$ M   | 0.81 $\mu$ M    | 6min         | Tap water                        |
| this work | 0-150 $\mu$ M  | 67nM            | 60s          | Tap water<br>A549 cells          |
